# Supplementary material
Source: PubMed Central journal article supplement (PMC4993161)

Supporting Information

© Wiley-VCH 2014

69451 Weinheim, Germany

**The Strongest Brønsted Acid: Protonation of Alkanes by  $\text{H}(\text{CHB}_{11}\text{F}_{11})$   
at Room Temperature\*\***

*Matthew Nava, Irina V. Stoyanova, Steven Cummings, Evgenii S. Stoyanov, and  
Christopher A. Reed\**

anie\_201308586\_sm\_miscellaneous\_information.pdf

## Contents:

**Figs. S1-S4:** IR,  $^{19}\text{F}$ ,  $^{11}\text{B}$  NMR and mass spectra of  $\text{Cs}(\text{CHB}_{11}\text{F}_{11})$

**Figs. S5-S6:** IR and  $^1\text{H}$  NMR spectra of  $\text{AgCHB}_{11}\text{F}_{11} \cdot 2\text{C}_6\text{H}_6$

**Figs. S7-S8:** IR and  $^1\text{H}$  NMR spectra of  $[(\text{C}_6\text{H}_5)_3\text{C}][\text{CHB}_{11}\text{F}_{11}]$

**Fig. S9:** IR spectrum of  $[(\text{Et}_3\text{Si})_2\text{H}][\text{CHB}_{11}\text{F}_{11}]$

**Fig. S10:** IR spectrum of protio and deuterio  $\text{H}(\text{CHB}_{11}\text{F}_{11})$

**Fig. S11:** IR spectrum of  $[\text{H}_3\text{O}^+][\text{CHB}_{11}\text{F}_{11}]$

**Fig. S12:** IR spectrum of  $[\text{C}_6\text{H}_7][\text{CHB}_{11}\text{F}_{11}]$  compared to  $[\text{C}_6\text{H}_7][\text{CHB}_{11}\text{Cl}_{11}]$

**Fig. S13:** Gas Chromatographic trace showing the detection of  $\text{H}_2$

**Fig. S14:** IR spectrum of carbocation(s) from protonation of *n*-hexane

**Fig. S15-S17:** IR spectrum of *t*-butyl cation from protonation of *n*-butane, compared to  $[t\text{-Bu}^+][\text{CHB}_{11}\text{Cl}_{11}^-]$ .

**Fig. S18-S20:** Gc and mass spectral data showing the production of hexene from  $\text{C}_6$  carbocation salt and NaH in  $\text{SO}_2$ .

**Fig. S21:** Gc of alkanes produced by reaction of ground  $\text{NaH}_{(s)}$  with  $\text{C}_6$  carbocation salts.

**Fig. S22:** Gc of *iso*-butane produced by reaction of ground  $\text{NaH}_{(s)}$  with  $t\text{-Bu}^+ [\text{CHB}_{11}\text{F}_{11}^-]$ .

(17 pages)

**Fig. S1.** ATR-IR spectrum of Cs(CHB<sub>11</sub>F<sub>11</sub>):

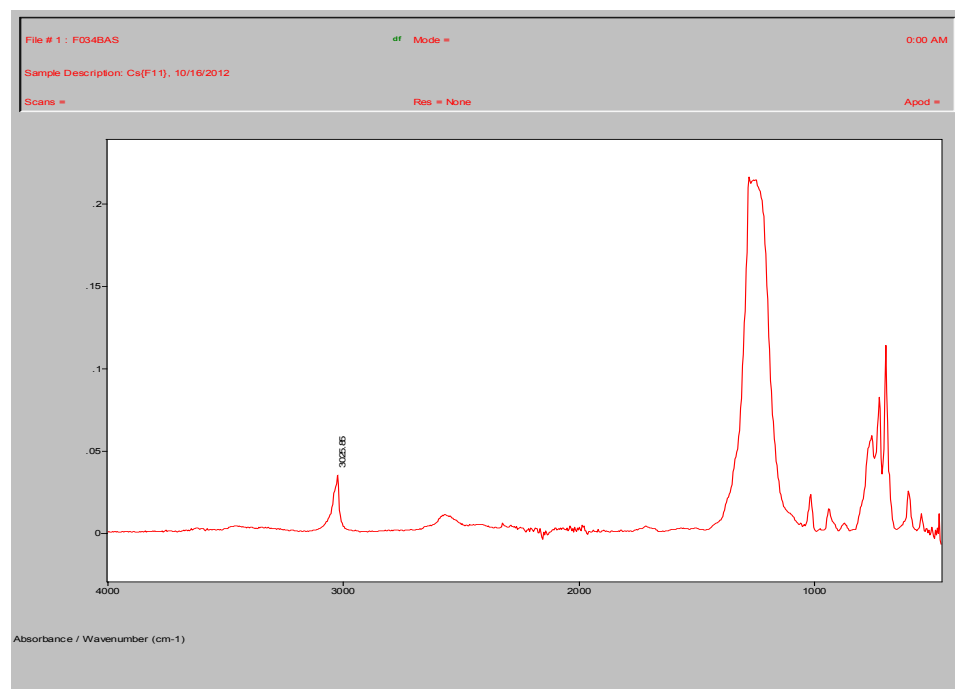

**Fig. S2.** <sup>19</sup>F NMR Cs(CHB<sub>11</sub>F<sub>11</sub>) in acetone-*d*<sub>6</sub>:

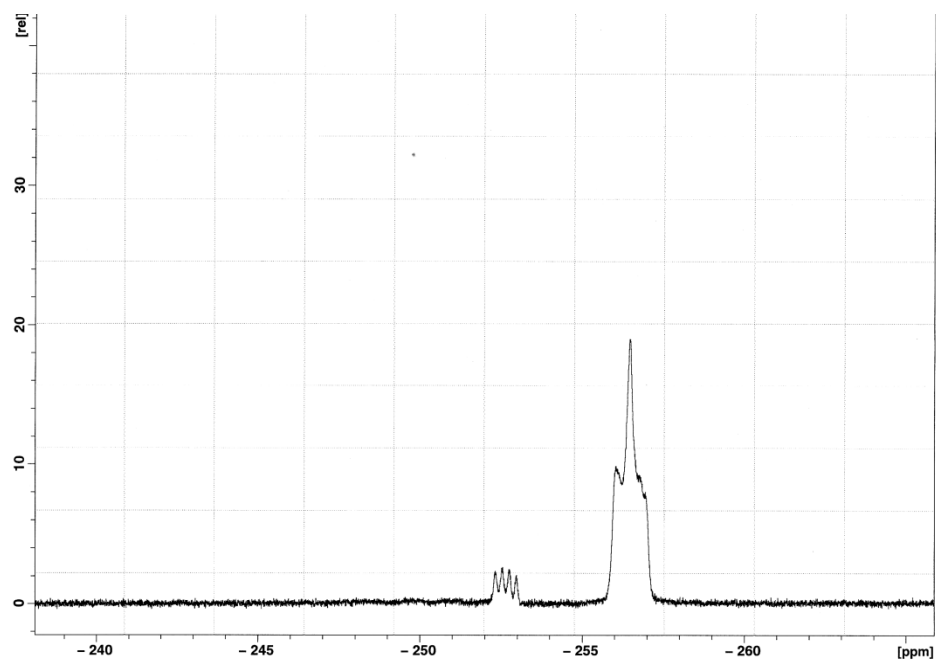

Fig. S3.  $^{11}\text{B}$  NMR  $\text{Cs}(\text{CHB}_{11}\text{F}_{11})$  in acetone- $d_6$ :

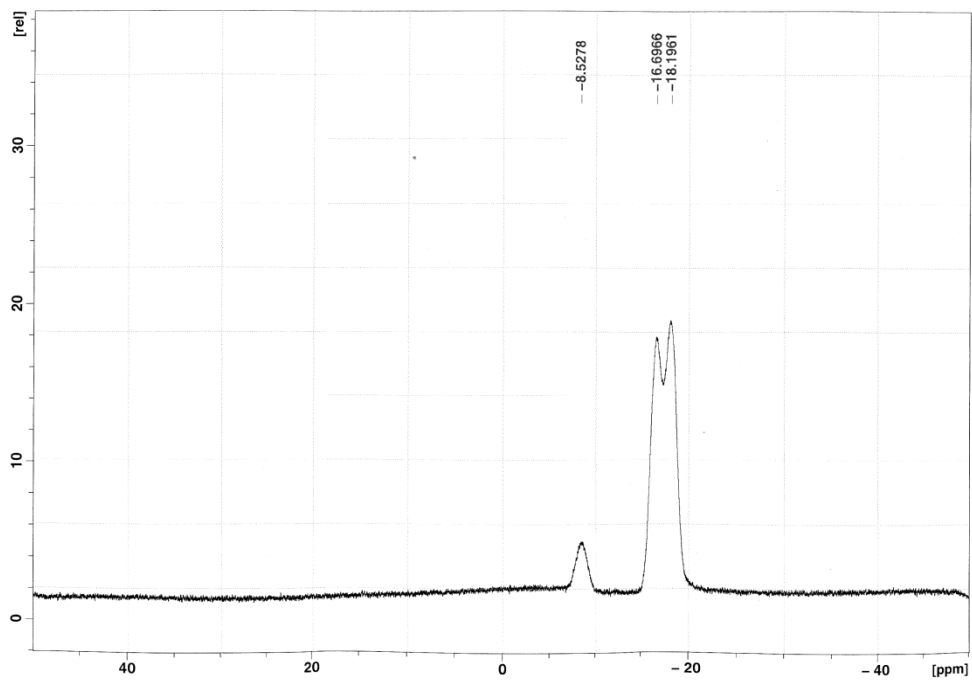

Fig. S4. Negative ion electrospray ionization mass spectrum of  $\text{Cs}(\text{CHB}_{11}\text{F}_{11})$ :

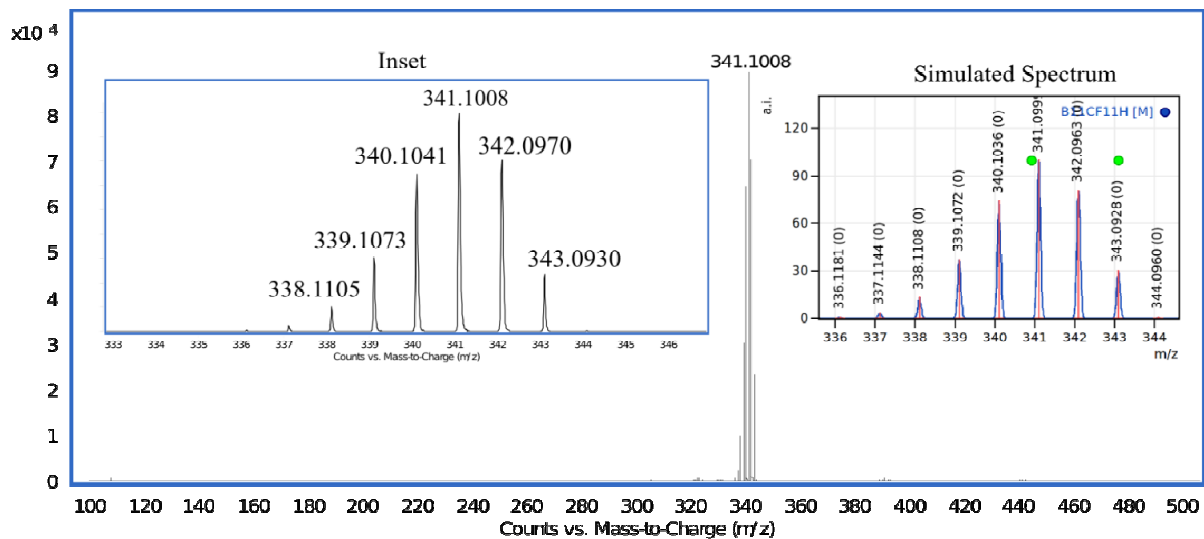

Fig. S5. ATR IR spectrum of  $\text{Ag}(\text{CHB}_{11}\text{F}_{11}) \cdot 2\text{C}_6\text{H}_6$ :

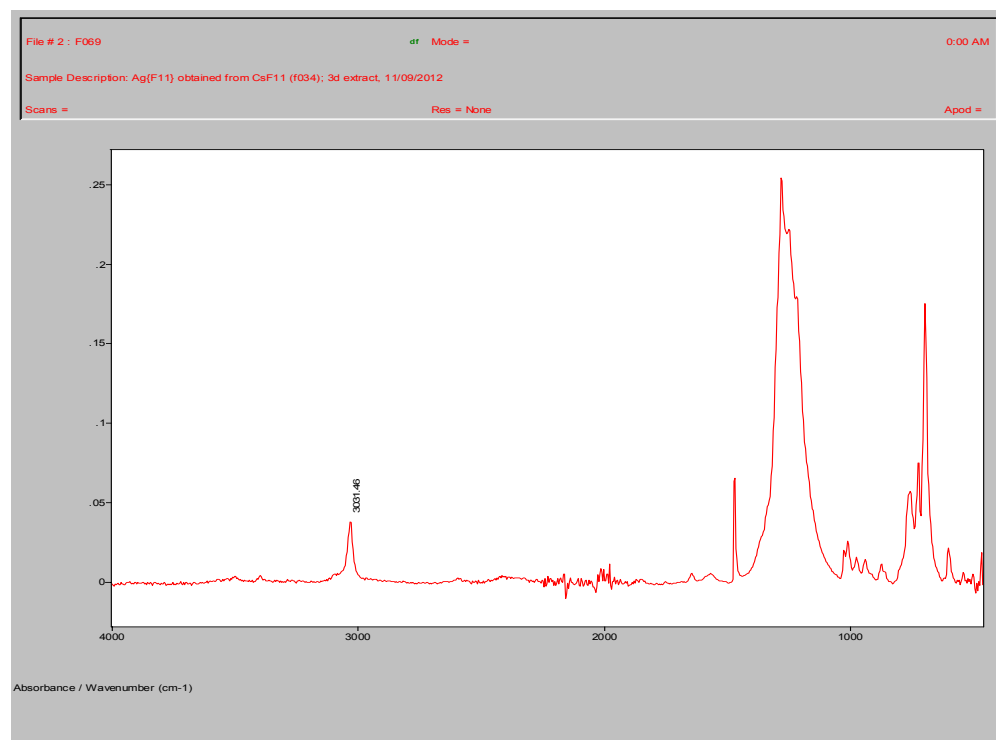

Fig. S6.  $^1\text{H}$  NMR spectrum of  $\text{Ag}(\text{CHB}_{11}\text{F}_{11}) \cdot 2\text{C}_6\text{H}_6$ :

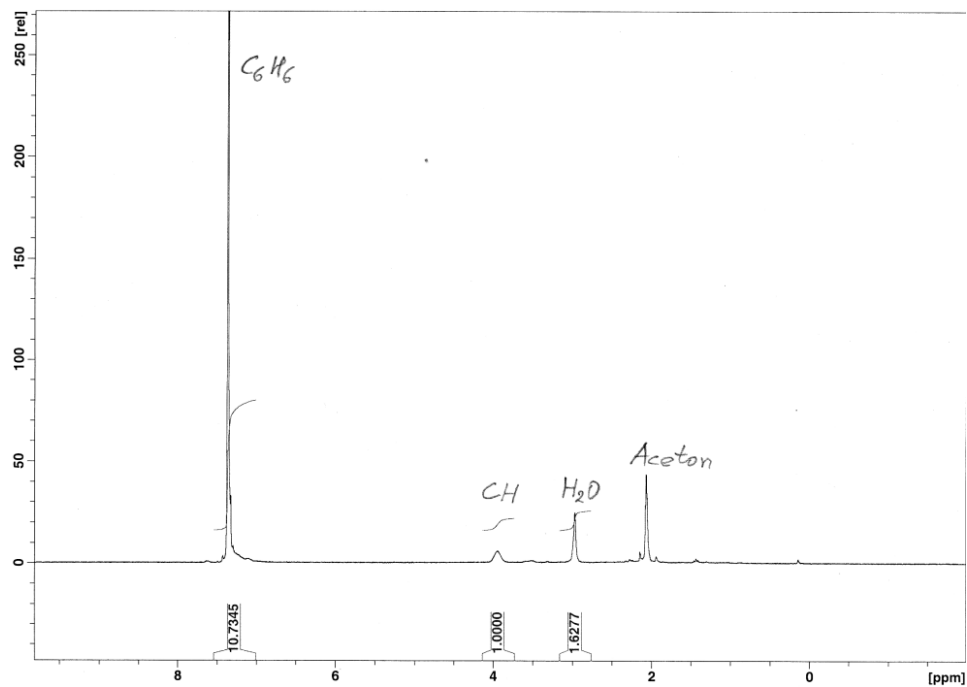

Fig. S7. ATR IR spectrum of  $[(C_6H_5)_3C][CHB_{11}F_{11}]$ :

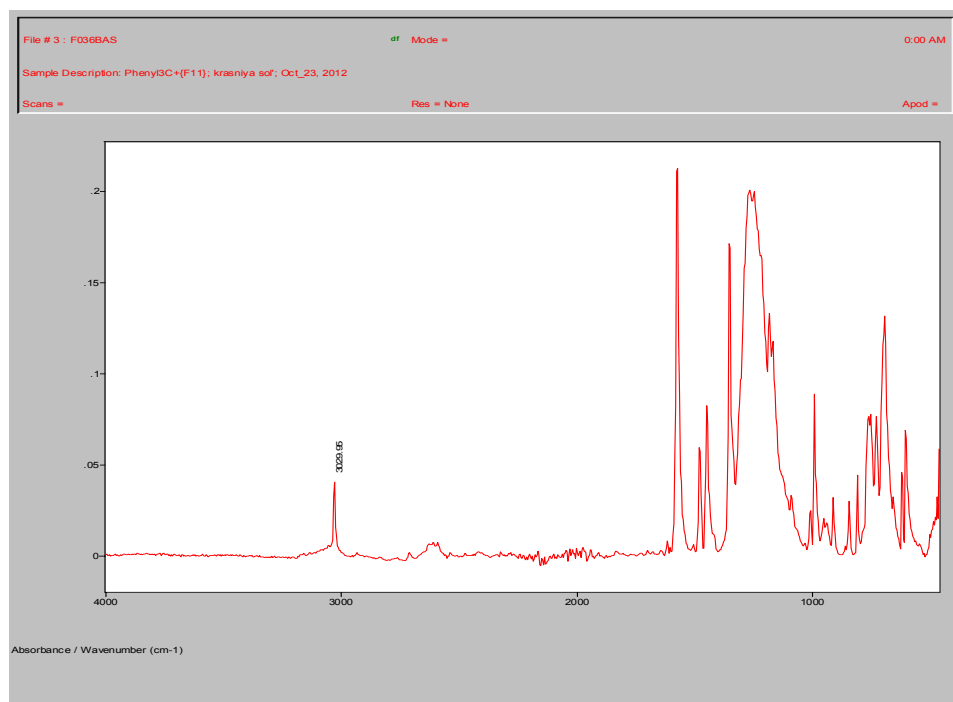

Fig. S8. <sup>1</sup>H NMR  $[(C_6H_5)_3C][CHB_{11}F_{11}]$  in CD<sub>2</sub>Cl<sub>2</sub>.

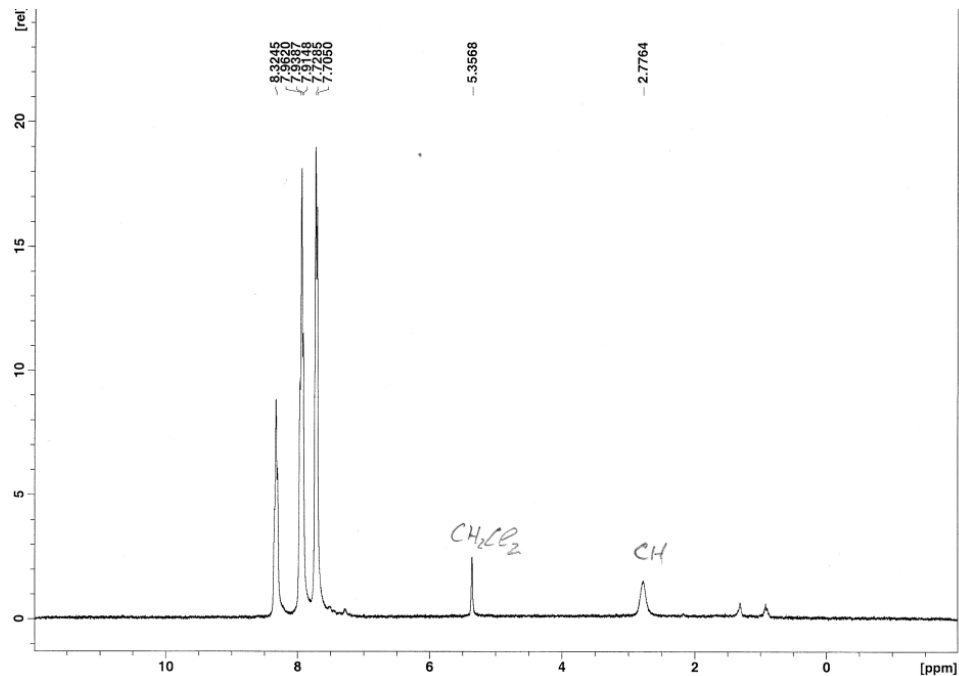

**Fig. S9.** ATR IR spectrum of  $[(Et_3Si)_2H][(CHB_{11}F_{11})]$ . Note the diagnostic  $\nu SiHSi$  band at  $1873\text{ cm}^{-1}$ .<sup>[25]</sup>

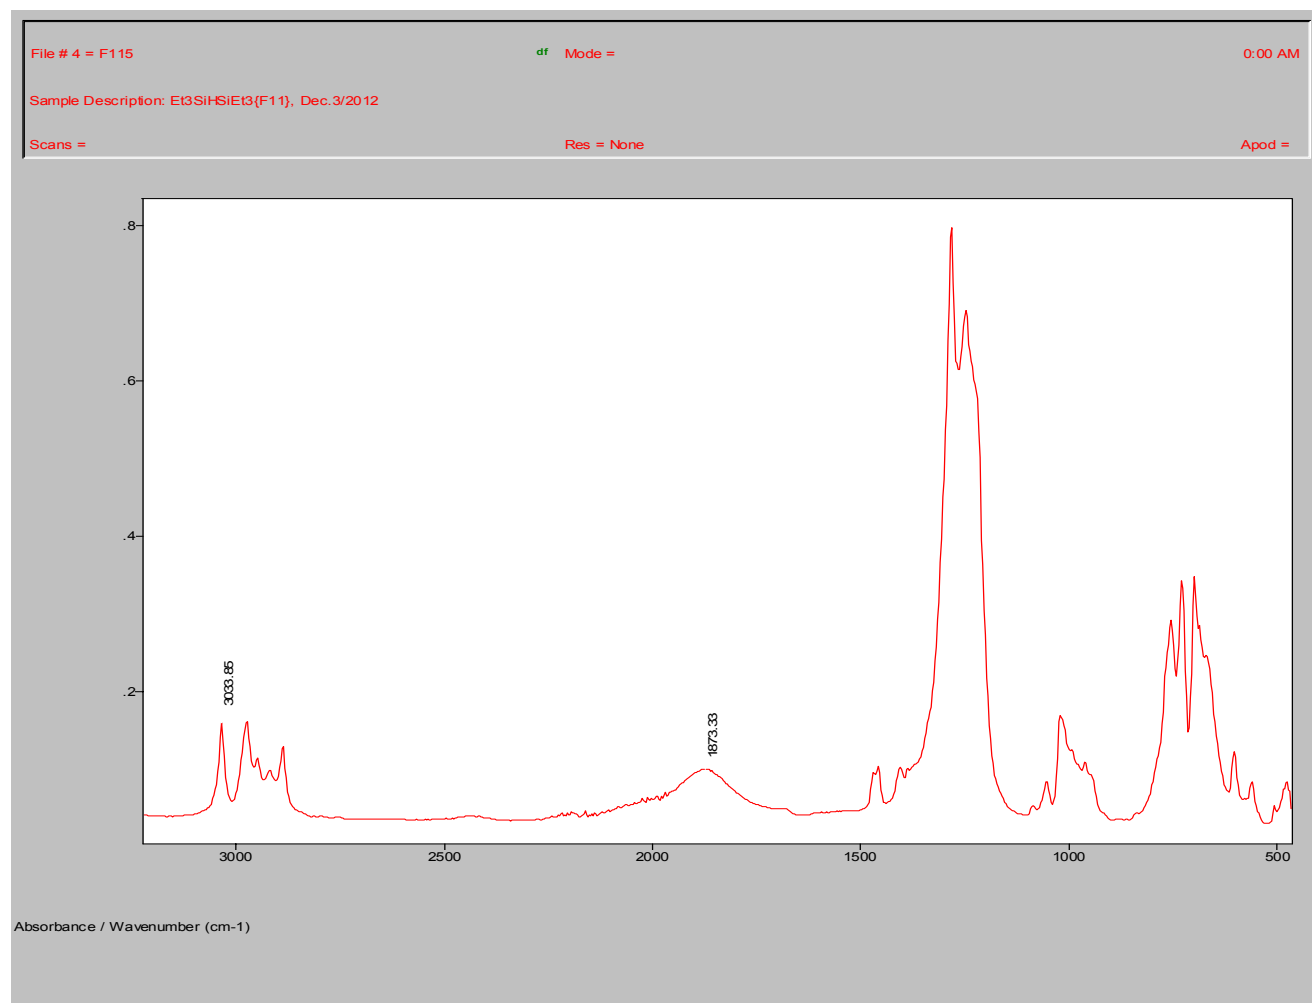

**Fig. S10.** Comparison of IR spectra of protio (blue) and deuterio (red)  $\text{H}(\text{CHB}_{11}\text{F}_{11})$  with assignments indicated below. Unaffected peaks (black font in assignments given below) are  $\nu\text{CH}$  of the anion at  $3029\text{ cm}^{-1}$ ,  $\nu\text{BB}$  at ca.  $1200\text{ cm}^{-1}$  (which happens to coincide with  $\nu\text{FDF}$ ) and four relatively sharp  $\nu\text{BF}$  bands in the  $700\text{ cm}^{-1}$  region. Complexity in the region below  $1000\text{ cm}^{-1}$  indicates that  $\delta\text{FHF}$  and/or  $\delta\text{FDF}$  are broad and either anharmonic or subject to distortions from resonance effects leading to transparent windows (Evans holes), an effect commonly observed in strongly H-bonded systems. See discussion in ref. 14, p13872.

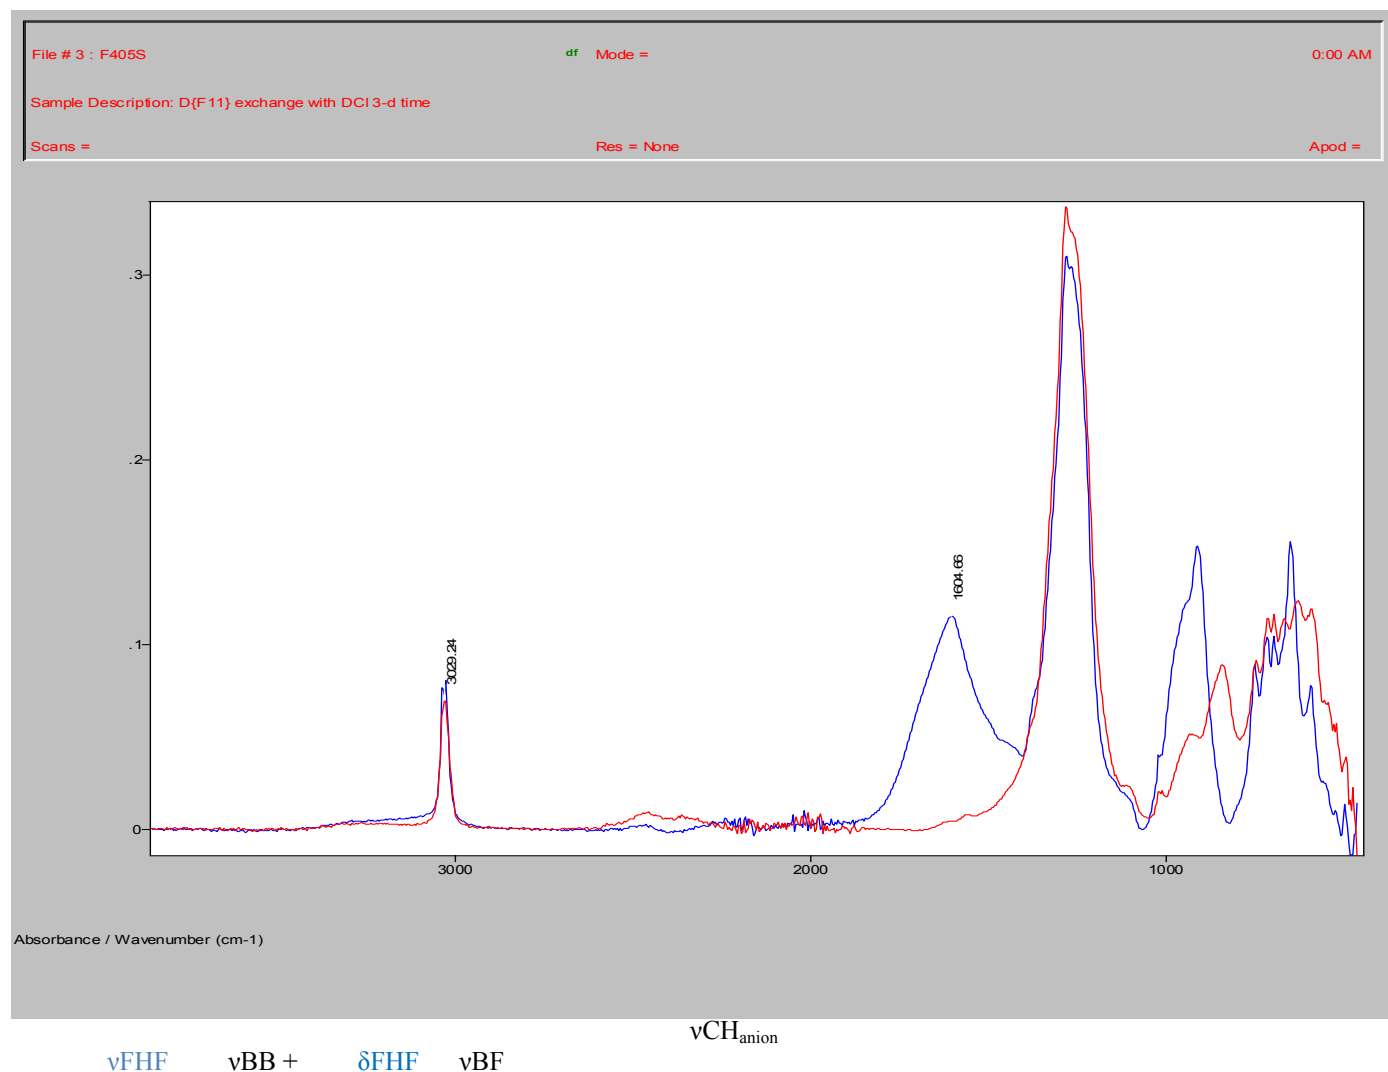



**Fig. S11.** IR spectrum of  $[\text{H}_3\text{O}][\text{CHB}_{11}\text{F}_{11}]$  from minimal exposure of  $\text{H}(\text{CHB}_{11}\text{F}_{11})$  to moist air:

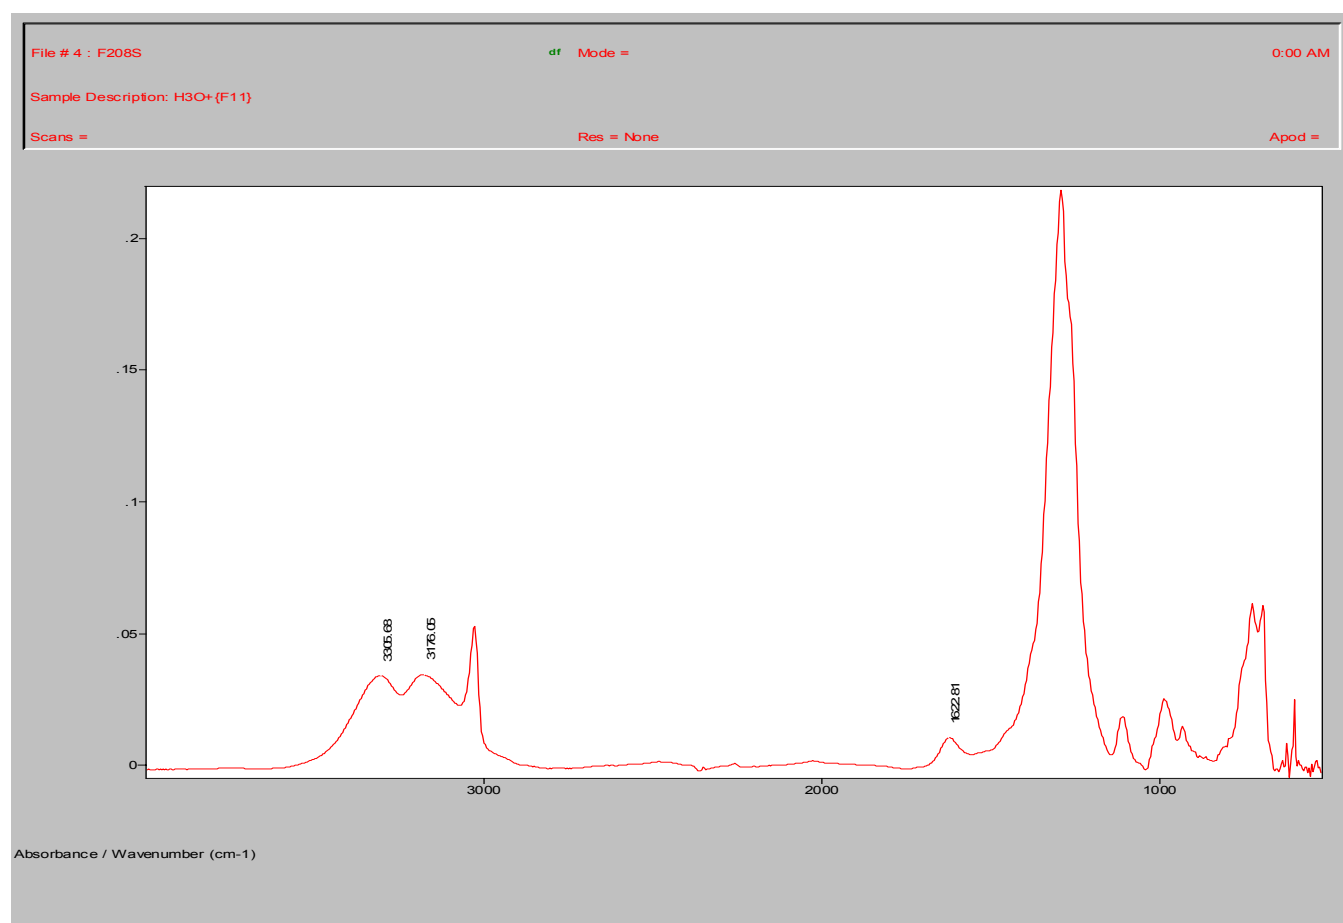

**Fig. S12.** IR spectra of the benzenium ion salt  $[\text{C}_6\text{H}_7][\text{CHB}_{11}\text{F}_{11}]$  from contact of  $\text{H}(\text{CHB}_{11}\text{F}_{11})_{(s)}$  with dry benzene (red) compared with that of known  $[\text{C}_6\text{H}_7][\text{CHB}_{11}\text{Cl}_{11}]$  (blue). The ring  $\nu\text{C-C}$  bands near  $1500\text{ cm}^{-1}$  coincide but the  $\nu\text{CH}$  bands vary with anion because of H-bonding. The  $\nu\text{CH}$  bands are assigned as follows:  $sp^2$  aromatic ca.  $3100\text{ cm}^{-1}$ , carborane anion  $3029\text{ cm}^{-1}$  and  $sp^3$   $2700\text{-}2820\text{ cm}^{-1}$ .

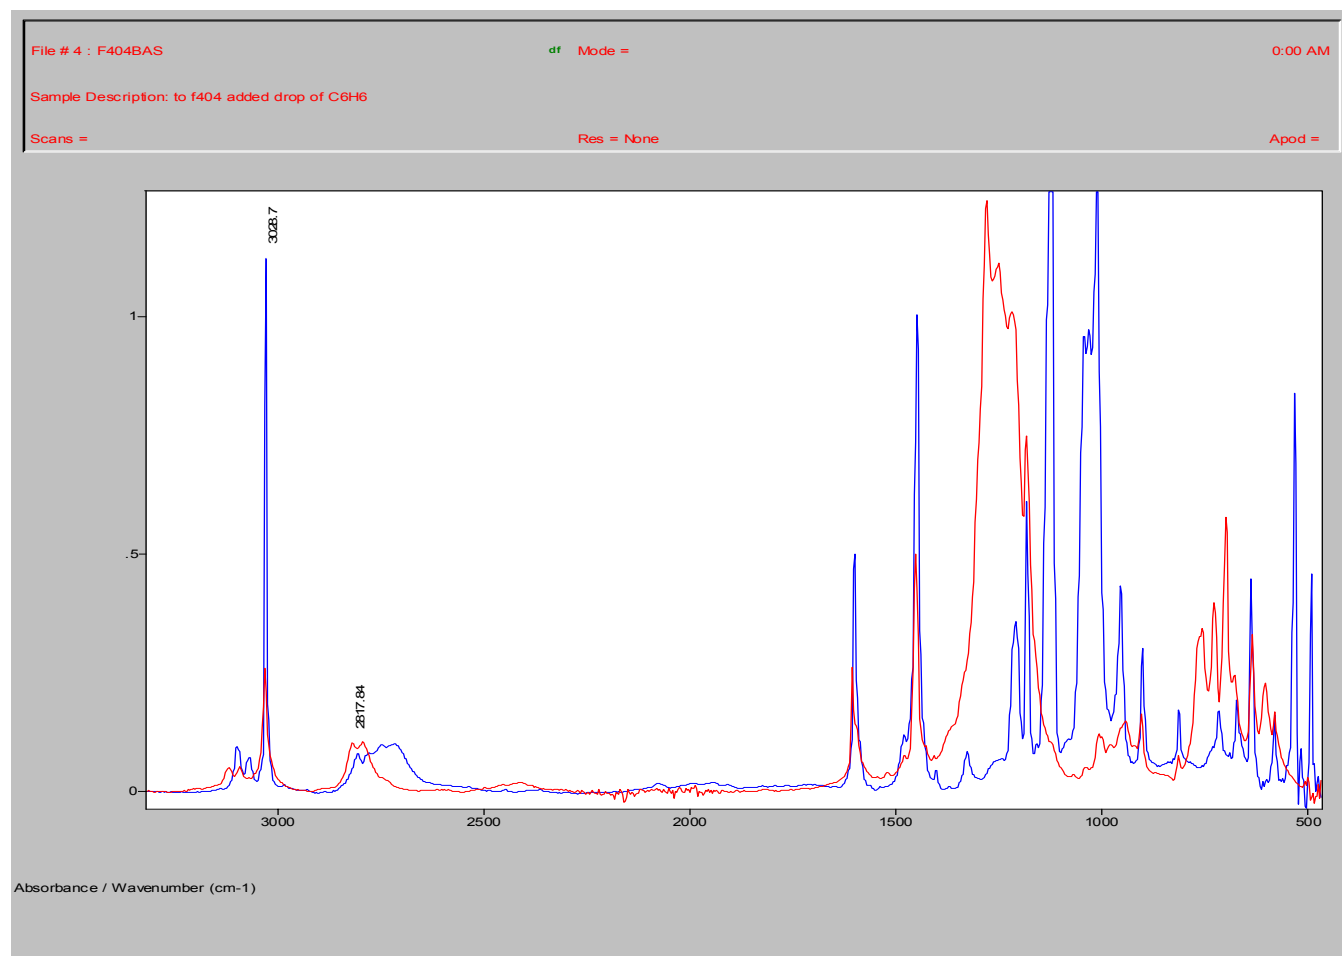

**Fig. S13.** Gas Chromatographic trace for detection of H<sub>2</sub> (1.7 min) from the reaction of H(CHB<sub>11</sub>F<sub>11</sub>) with hexane under N<sub>2</sub> (3.7 min). About 50 mg of H(CHB<sub>11</sub>F<sub>11</sub>) was placed in a Schlenk tube under an N<sub>2</sub> atmosphere inside a glove box and 0.5 ml of *n*-hexane was added. After 8 h, when ca. 75% of acid was converted to carbocation salt(s), the gaseous phase was analyzed. Prior to this analysis, the gc was calibrated with a gas sample known to contain dihydrogen in dinitrogen.

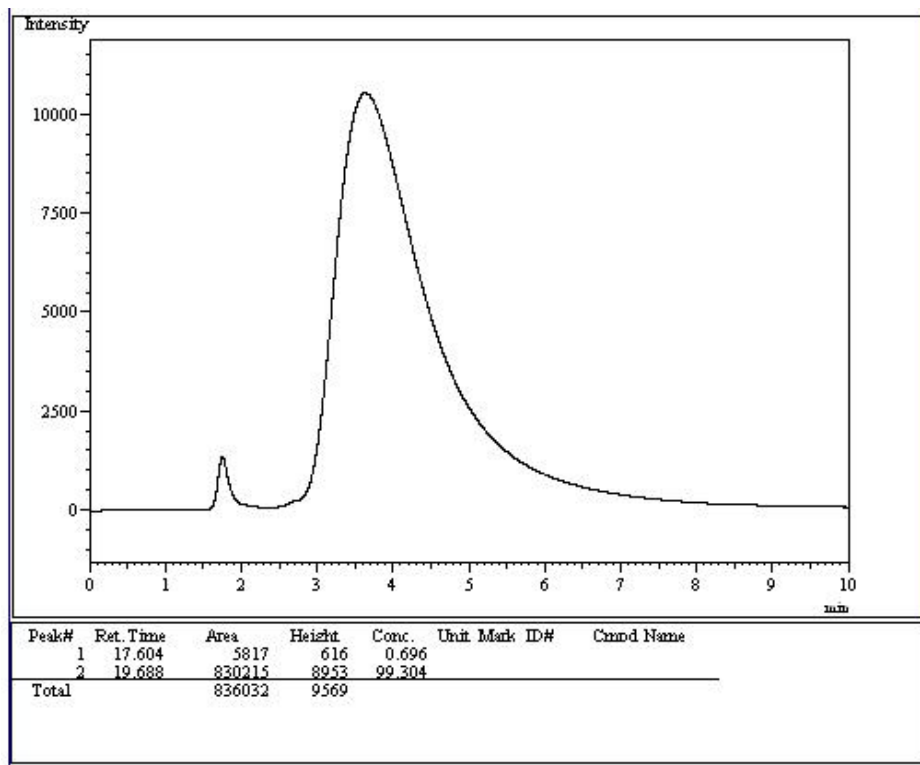

**Fig. S14.** IR spectrum of carbocation salt(s) resulting from the reaction of  $\text{H}(\text{CHB}_{11}\text{F}_{11})$  with *n*-hexane. The spectrum of remnant unreacted acid has been subtracted.

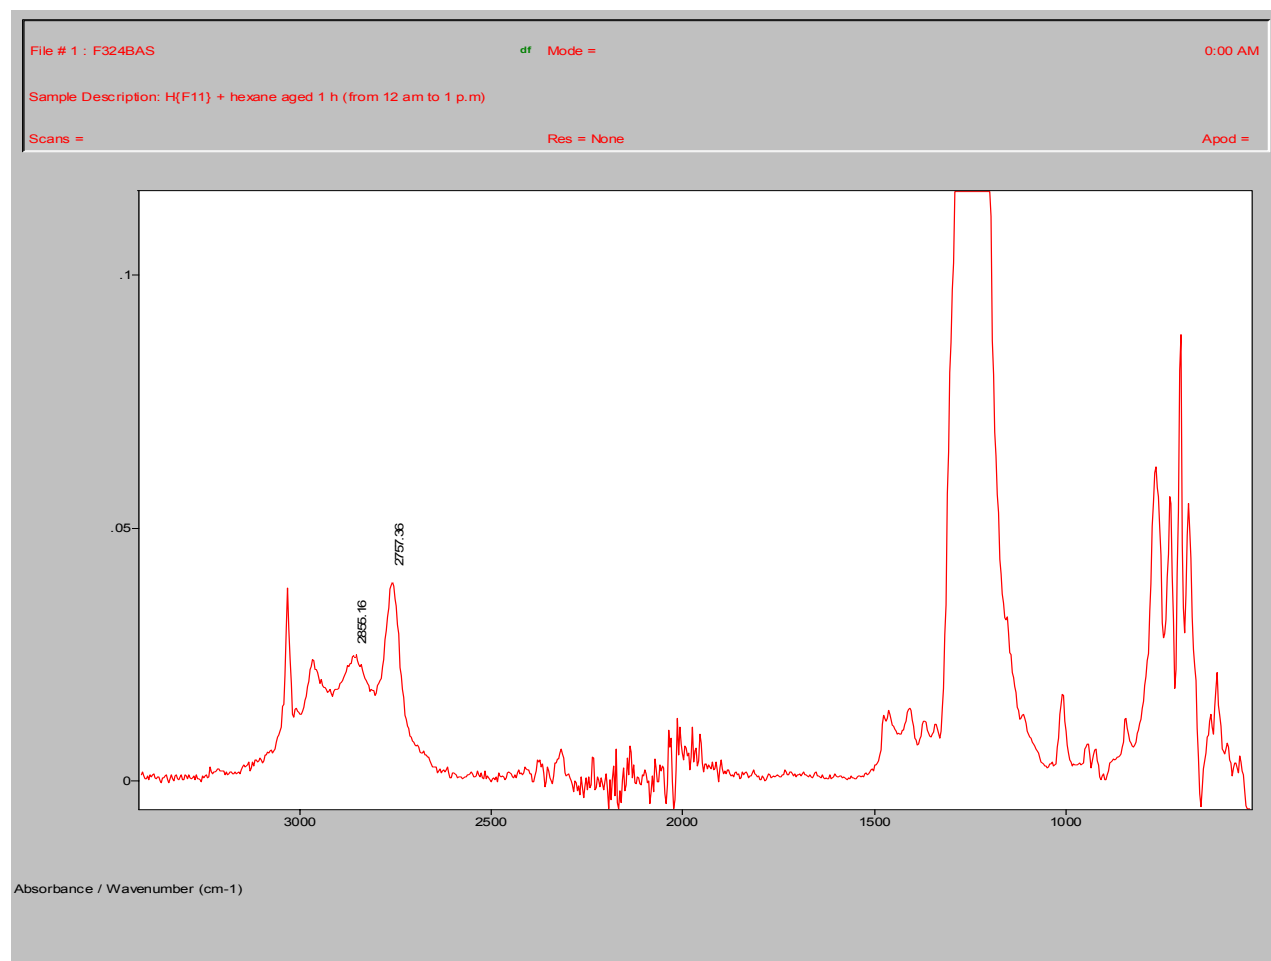

**Fig. S15.** IR spectrum of the *t*-butyl cation salt resulting from the reaction of H(CHB<sub>11</sub>F<sub>11</sub>) with *n*-butane. The spectrum of a small amount of unreacted acid has been subtracted.

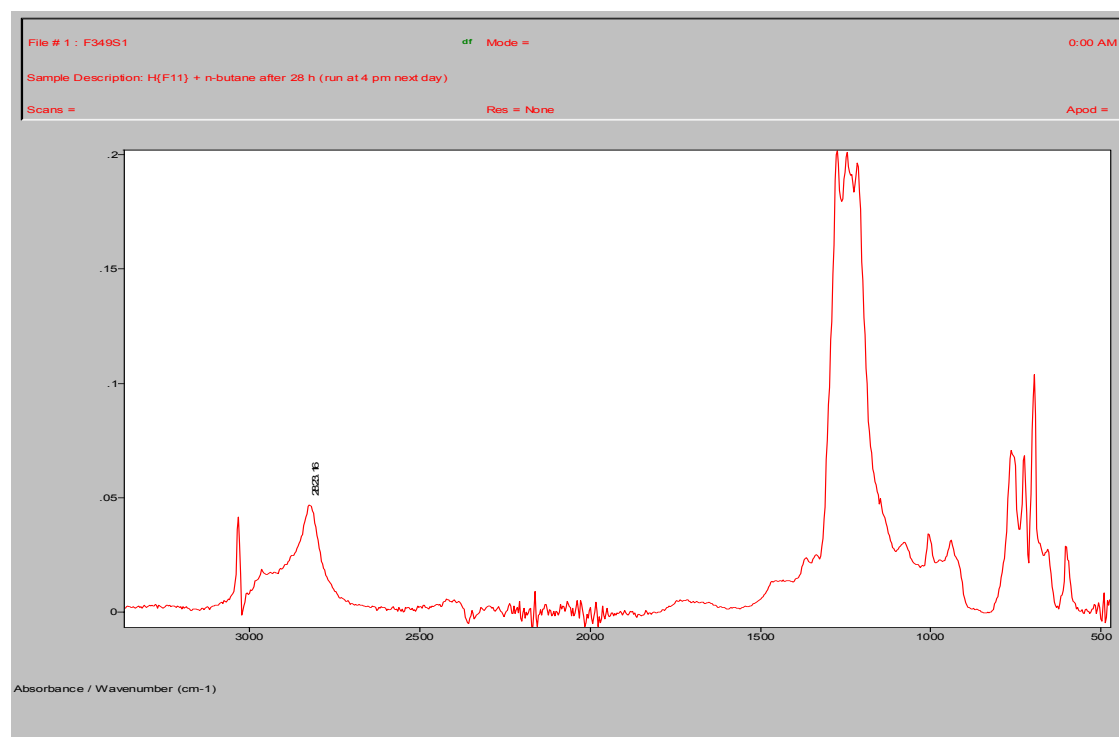

**Fig. S16.** IR spectrum of known [*t*-Bu<sup>+</sup>][CHB<sub>11</sub>Cl<sub>11</sub><sup>-</sup>] for comparison to Fig. S15 above. Note the similarity in the shape of the broad νCH band near 2800 cm<sup>-1</sup>. Attempts to subtract the respective anions from S15 and S16 only partially helps to reveal the identity of the cation because (a) the cation spectra are not expected to be identical -- due to differences in CH hydrogen bonding with basicity of anion, and (b) cation-anion interactions in the solid state change the *anion* spectra as well, so finding the correct anion spectrum to subtract is problematic. Nevertheless, see Fig. S17 on following page.

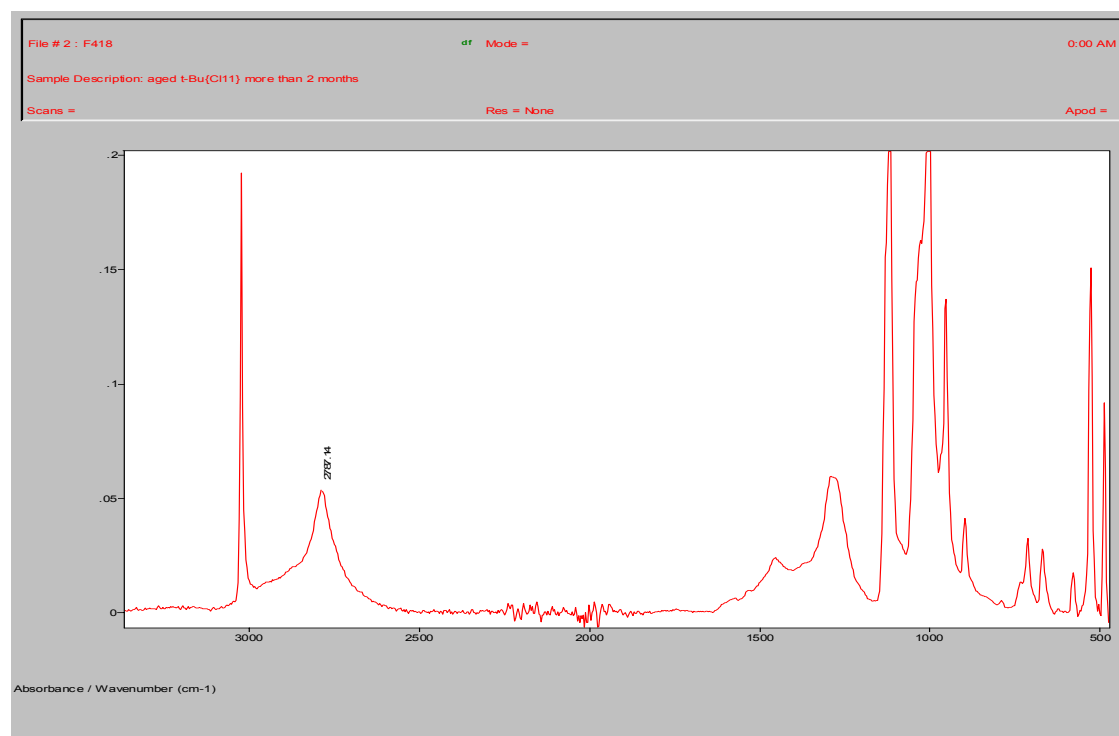

**Fig. S17.** Comparison of Figs. S15 (red) and S16 (black) showing coincidence of the two broad bands in the 1280-1400  $\text{cm}^{-1}$  region arising from  $\delta\text{CH}$  of  $t\text{-Bu}^+$  and inexact subtraction of the anion below 1400  $\text{cm}^{-1}$  (using the anion spectrum of  $[\text{Et}_2\text{Cl}][\text{CHB}_{11}\text{Cl}_{11}]$ ).

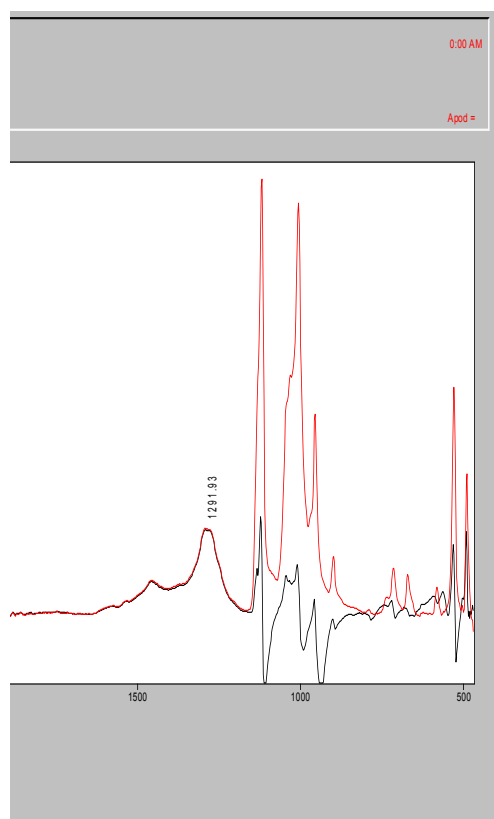

**Fig. S18.** Gas chromatographic trace of evolved hydrocarbon (hexene) from the reaction of  $C_6$  carbocation  $CHB_{11}F_{11}^-$  salt with NaH in  $SO_2(l)$ . Retention time (compound): 1.82 (Ar), 1.90 ( $SO_2$ ), 3.62 (reference compound), 4.38 (hexene). The sample was prepared by dissolving NaH (excess) and the  $C_6$  carbocation  $CHB_{11}F_{11}^-$  salt in dry liquid  $SO_2$  and stirring overnight at room temperature. After cooling to ca.  $-5^\circ C$ ,  $SO_2$  was allowed to boil off for several seconds and then, after warming the vessel to ca.  $30^\circ C$ , a  $30\ \mu L$  sample of the remaining head gas was taken by syringe for gc/ms measurement.

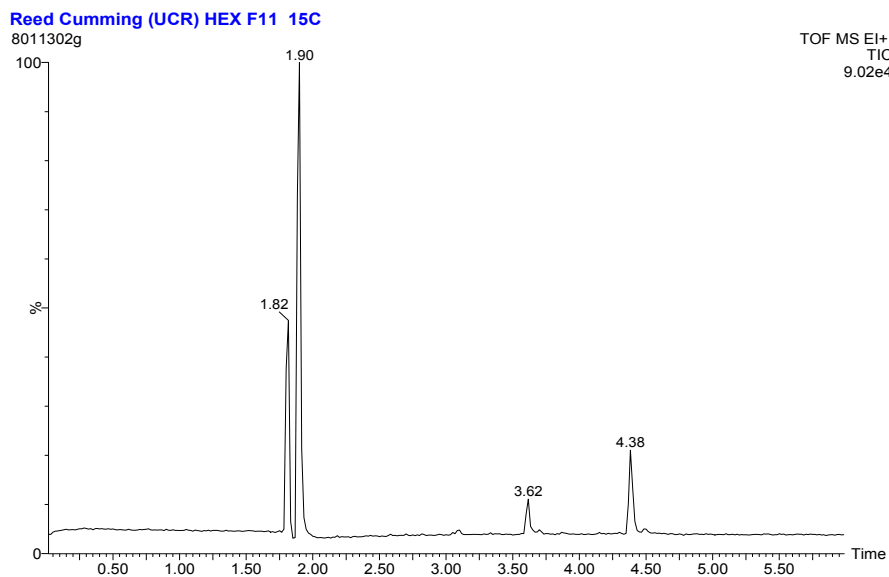

**Fig. S19.** Time of flight electron impact mass spectrum of hexene arising from deprotonation of  $C_6$  carbocation  $CHB_{11}F_{11}^-$  salt with NaH in liquid  $SO_2$ .

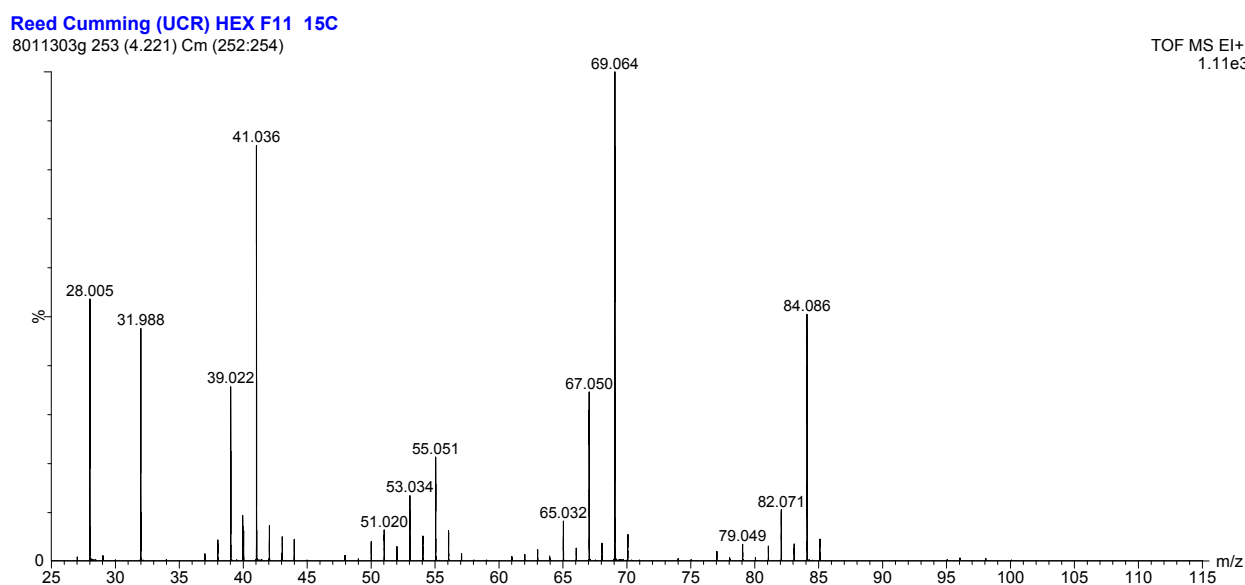

**Fig. S20.** Published electron impact mass spectra of various  $C_6$  alkenes (as well as methyl-*cyclo*-pentane) with formula  $C_6H_{12}$  for comparison to Fig. S19.

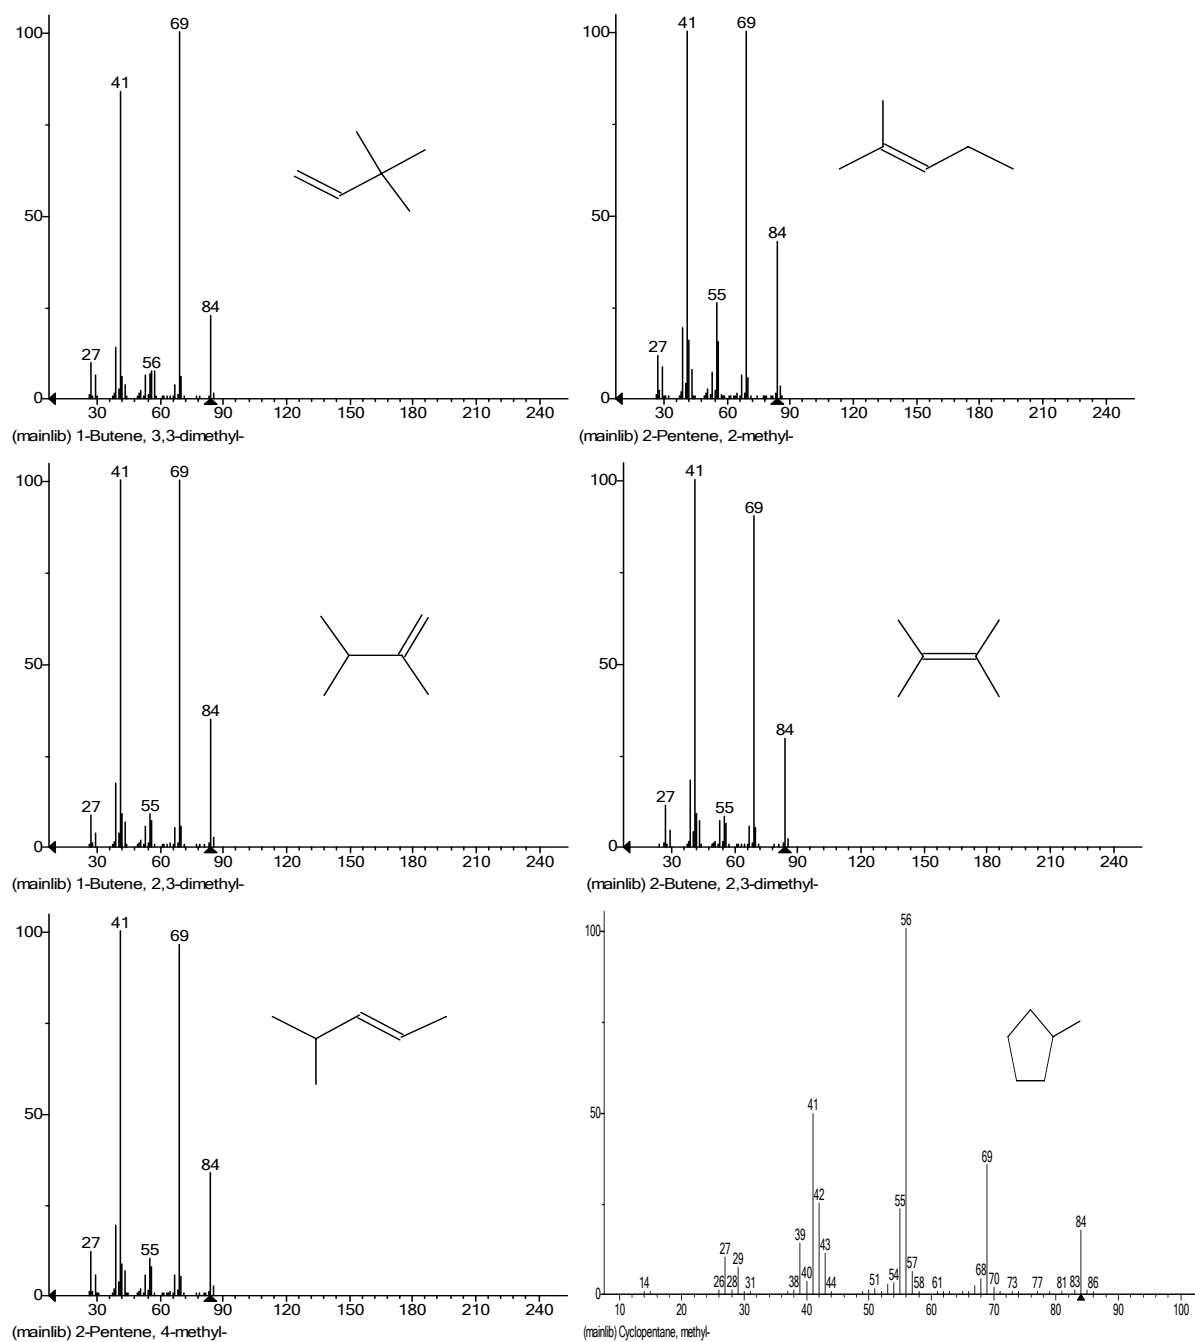



**Fig. S21.** Gas chromatograph of vapors above an intimately ground mixture of  $\text{NaH}_{(s)}$  and  $\text{C}_6$  carbocation salt isolated from the reaction of  $\text{H}(\text{CHB}_{11}\text{F}_{11})$  with *n*-hexane. Retention time (compound): 1.80 ( $\text{CO}_2$ ), 1.92 (*iso*-butane), 2.17 ref. compd., 2.23 ( $\text{C}_5\text{H}_{12}$  hydrocarbon), 2.28 ref. compd., 2.42 ref. compd., 2.67 (2,2-dimethylbutane), 2.80 ref. compd., 2.97 (2,3-dimethylbutane), 3.07 (2-methylpentane); 3.28 (3-methylpentane).

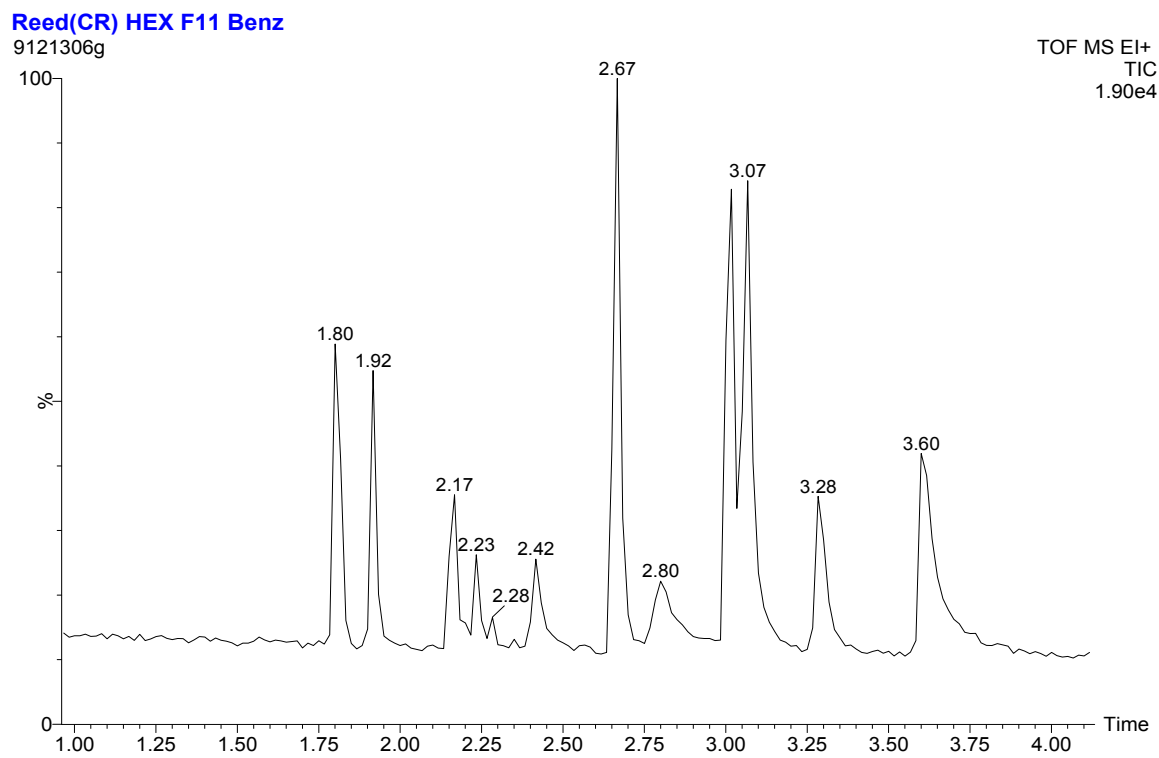

**Fig. S22.** Gas chromatogram of the head space vapors above an intimately ground mixture of  $\text{NaH}_{(s)}$  and  $t\text{-Bu}^+[\text{CHB}_{11}\text{F}_{11}]_{(s)}^-$  obtained from protonation of *n*-butane with  $\text{H}(\text{CHB}_{11}\text{F}_{11})$  showing *iso*-butane as the major product (1.92). Retention time (compound): 1.82 ( $\text{CO}_2$ ), 1.92 (*iso*-butane), 2.17, 2.42, 2.80 (reference compounds). Minor peaks at 2.05 and 2.25 correspond to traces of *n*-butane and a  $\text{C}_5\text{H}_{12}$  hydrocarbon, respectively, whose origin is uncertain.

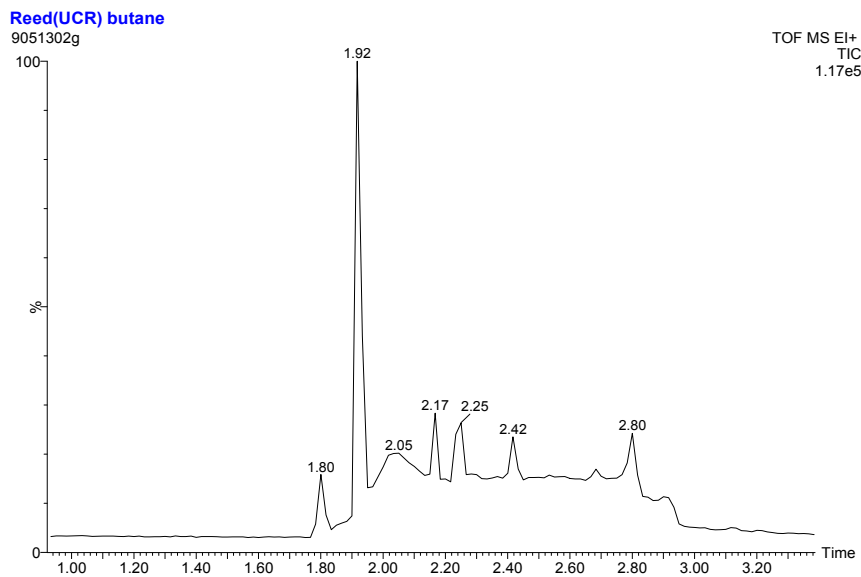

Supplement: NIHMS809495-supplement-Supplemental_Material.pdf [file NIHMS809495-supplement-Supplemental_Material.pdf]
